# Supplementary material for: Open ZnSe/C nanocages: multi-hierarchy stress-buffer for boosting cycling stability in potassium-ion batteries
Source: Royal Society of Chemistry journal article supplement (doi:10.1039/c9ta10088a), 2019-11-25
Supplement: c9ta10088a1.pdf [file c9ta10088a1.pdf]

## Electronic supplementary information

### Opening ZnSe/C Nanocages: Multi-Hierarchy Stress-Buffered Effect

### Boosts Cycling Stability in Potassium-Ion Batteries

Jianhua Chu,<sup>‡a</sup> Wei (Alex) Wang,<sup>‡b</sup> Qiyao Yu,<sup>\*c</sup> Cheng-Yen Lao,<sup>d</sup> Lin Zhang,<sup>e</sup> Kai Xi,<sup>d</sup> Kun Han,<sup>a</sup>  
Lidong Xing,<sup>a</sup> Lei Song,<sup>a</sup> Min Wang,<sup>\*a</sup> and Yanping Bao<sup>a</sup>

<sup>a</sup> *State Key Laboratory of Advanced Metallurgy, University of Science and Technology Beijing, Beijing 100083, China*

<sup>b</sup> *Beijing Key Laboratory of Bio-inspired Energy Materials and Devices, School of Space and Environment, Beihang University, Beijing 100191, China*

<sup>c</sup> *Institute of Advanced Structure Technology, Beijing Institute of Technology, Beijing 100081, China*

<sup>d</sup> *Department of Materials Science and Metallurgy, University of Cambridge, Cambridge CB3 0FS, UK*

<sup>e</sup> *Media Lab, Massachusetts Institute of Technology, Cambridge MA 02139, USA*

<sup>‡</sup> *These authors contributed equally to this work.*

<sup>\*</sup>*To whom correspondence should be addressed. Email: qiyaoyu@bit.edu.cn; worldmind@163.com*

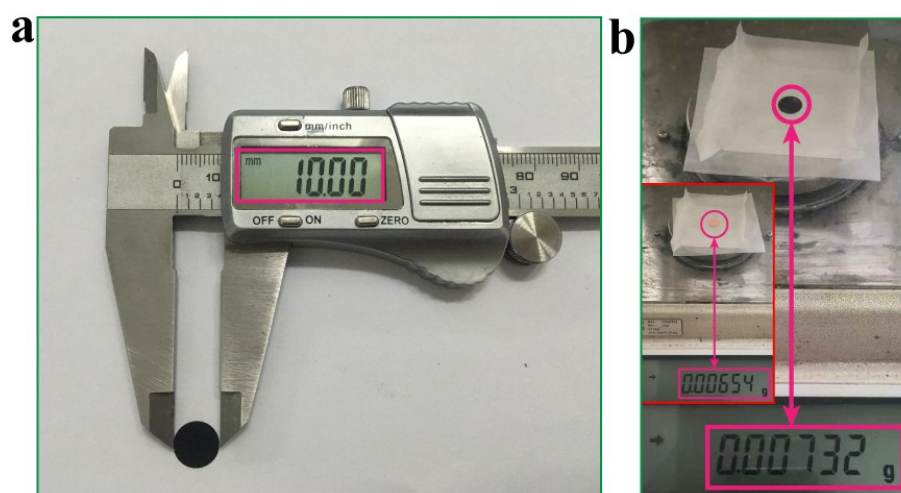

**Fig. S1** Digital photographs show (a) the diameter (10 mm) and (b) the mass loading of the electrode.

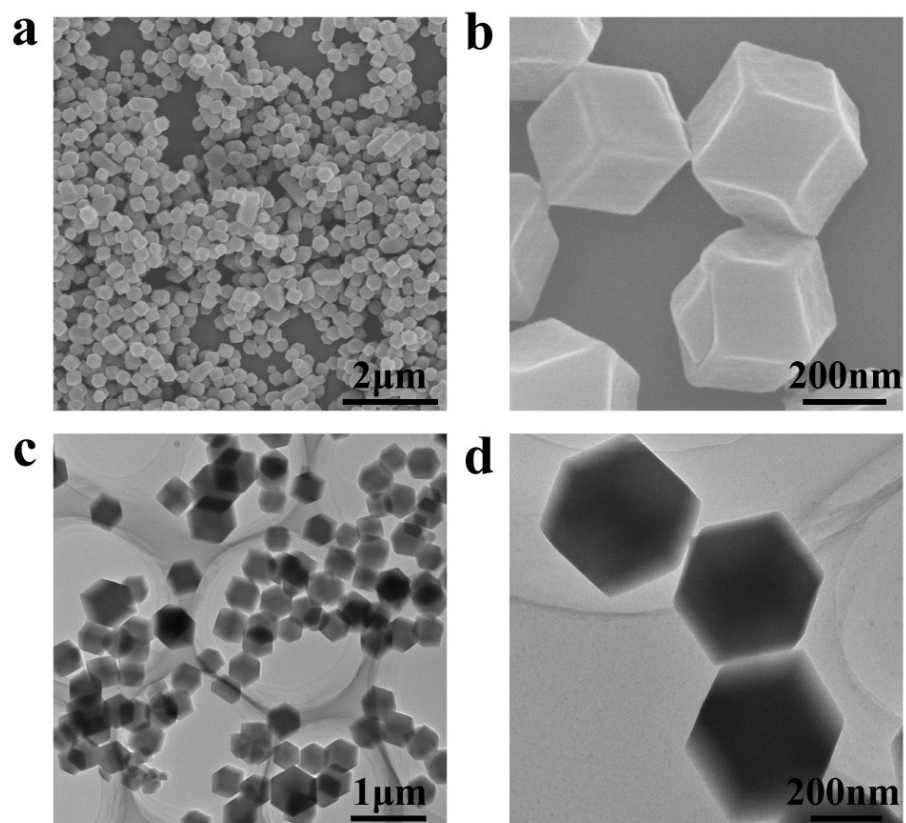

**Fig. S2** Morphological and structural characterizations of ZIF8. (a, b) FESEM images and (c, d) TEM images of the ZIF-8.

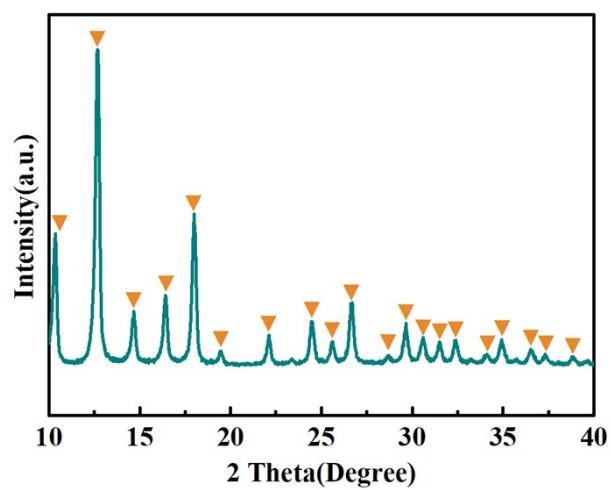

**Fig. S3** Crystalline structural analysis of ZIF-8. The XRD pattern of the ZIF-8.

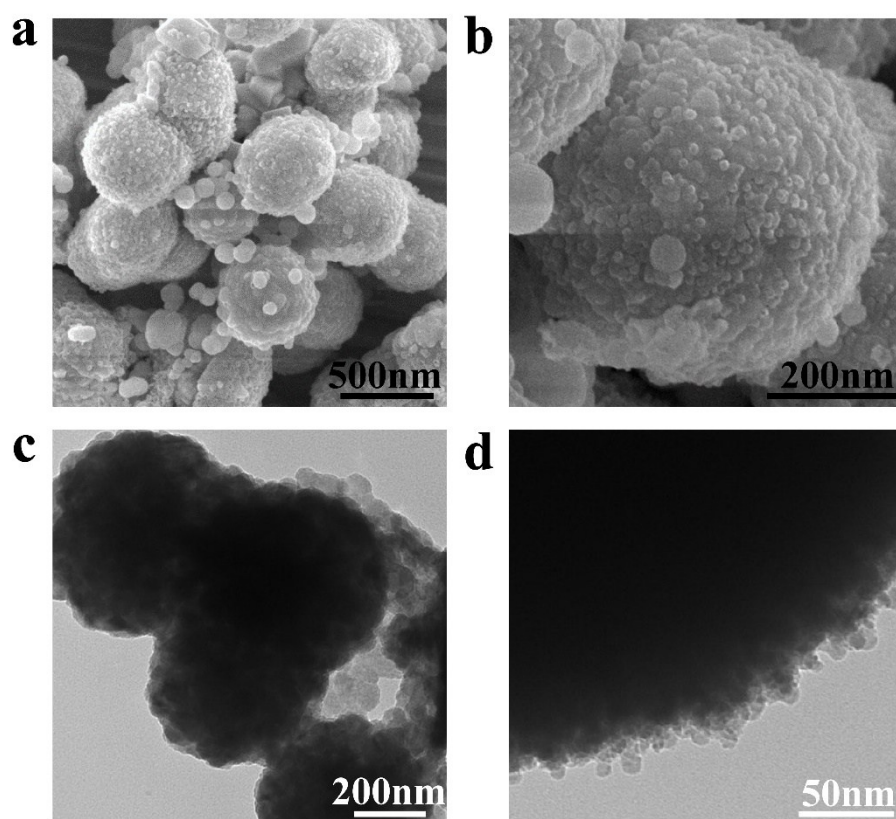

**Fig. S4** Morphological and structural characterizations of ZnSe LS/C. (a,b) FESEM images and (c, d) TEM images of the ZnSe LS/C.

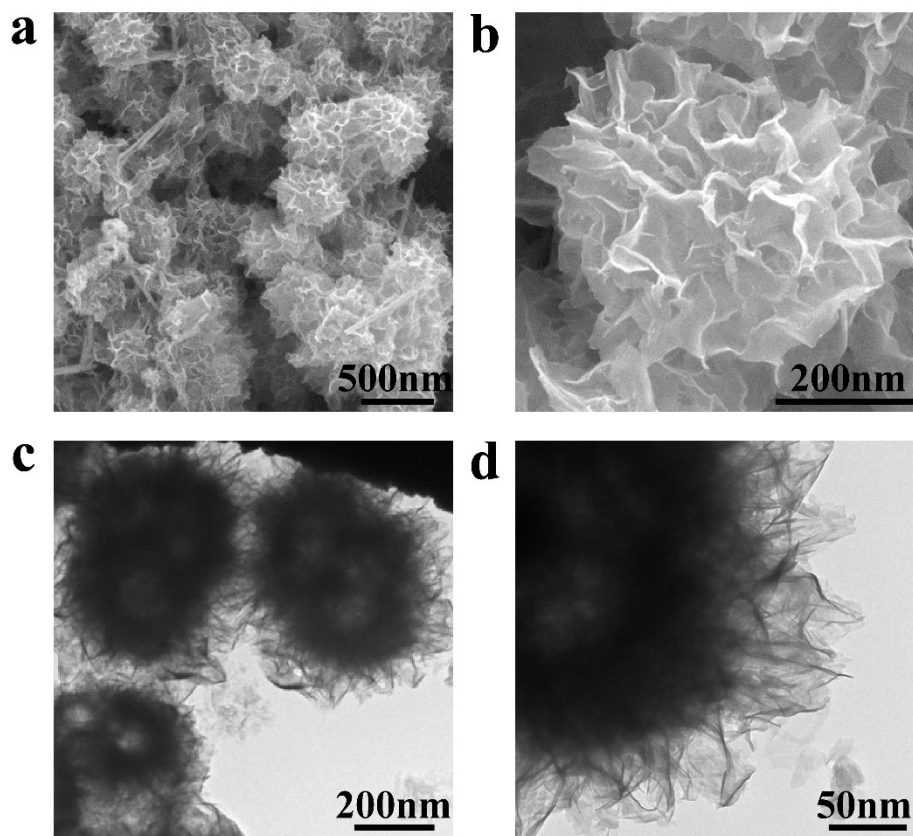

**Fig. S5** Morphological and structural characterizations of ZnSe FS/C. (a, b) FESEM images and (c, d) TEM images of the ZnSe FS/C.

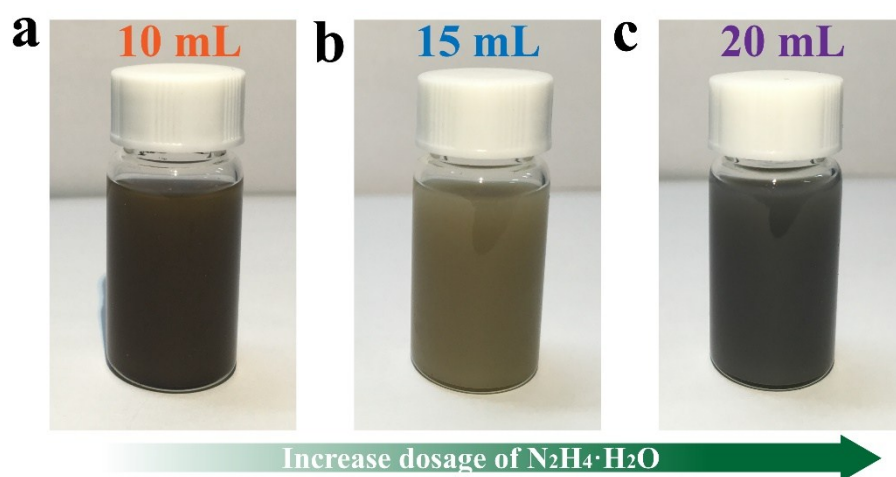

**Fig. S6** Optical images of the ZnSe LS/C, ZnSe CS/C and ZnSe FS/C. Solution photograph of the (a) ZnSe LS/C, (b) ZnSe CS/C and (c) ZnSe FS/C with different the dosage of  $\text{N}_2\text{H}_4 \cdot \text{H}_2\text{O}$ .

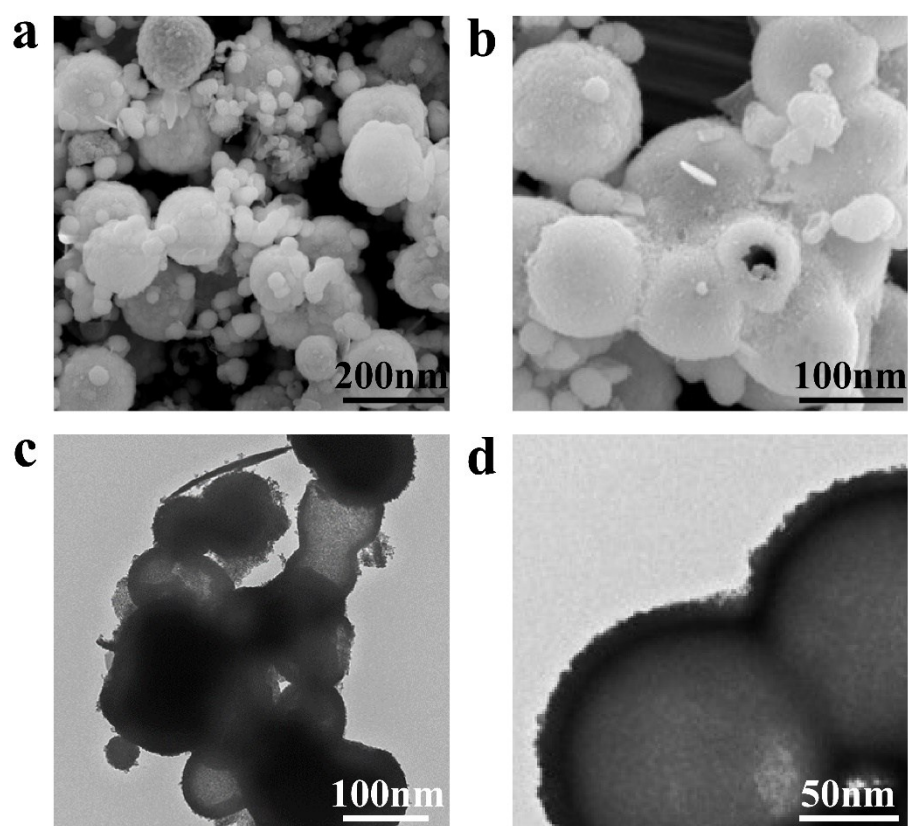

**Fig. S7** Morphological and structural characterizations of ZnSe CS/C-0.5. (a, b) FESEM images and (c, d) TEM images of the hydrothermal holding time of 0.5 hours (ZnSe CS/C-0.5).



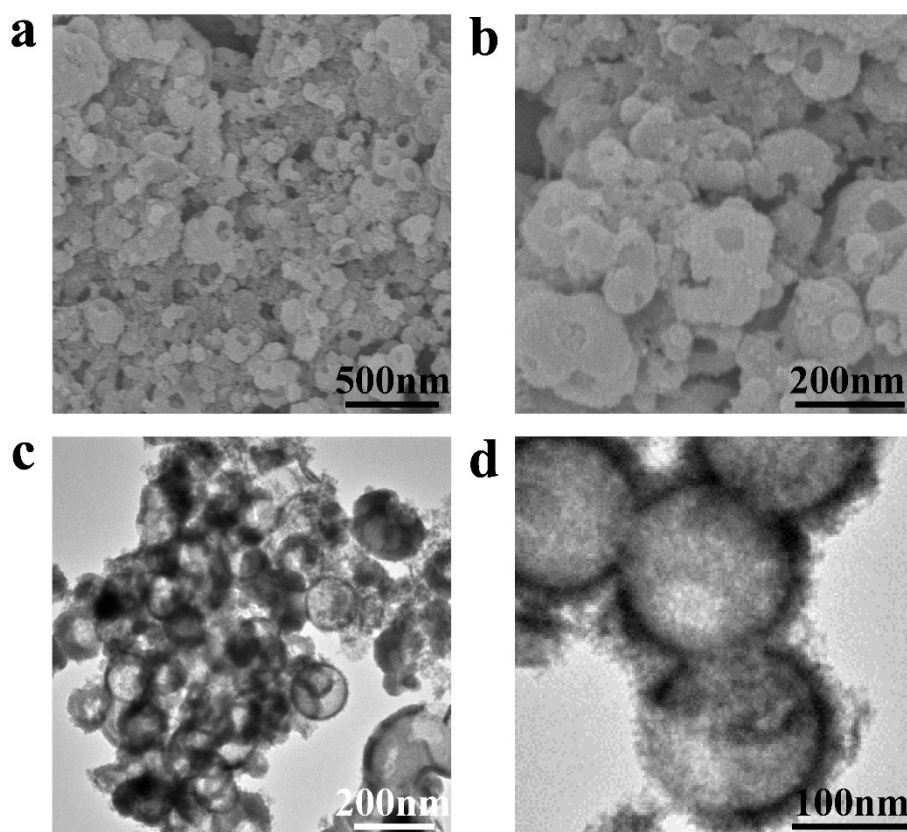

**Fig. S8** Morphological and structural characterizations of ZnSe CS/C-2. (a, b) FESEM images and (c, d) TEM images of the hydrothermal holding time of 2 hours (ZnSe CS/C-2).

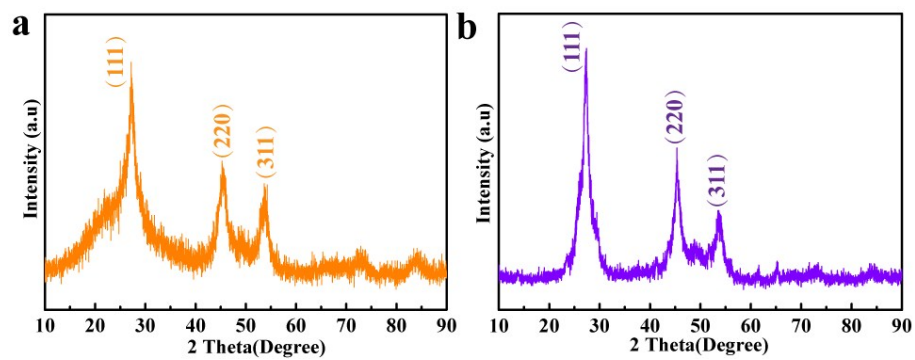

**Fig. S9** Crystalline structural analysis of ZnSe LS/C and ZnSe FS/C. The XRD pattern of the (a) ZnSe LS/C and (b) ZnSe FS/C.

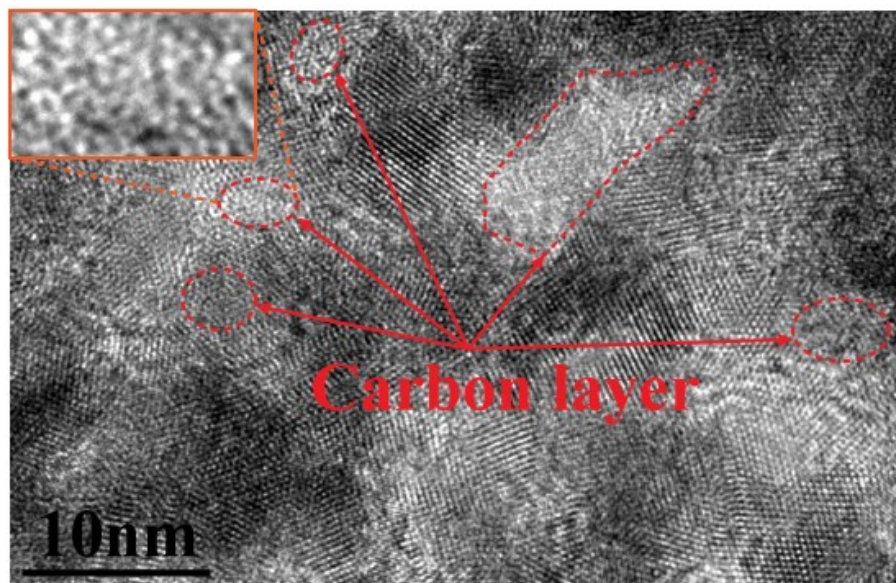

**Fig. S10** Structural characterizations of ZnSe CS/C. The HR-TEM image of the ZnSe CS/C.

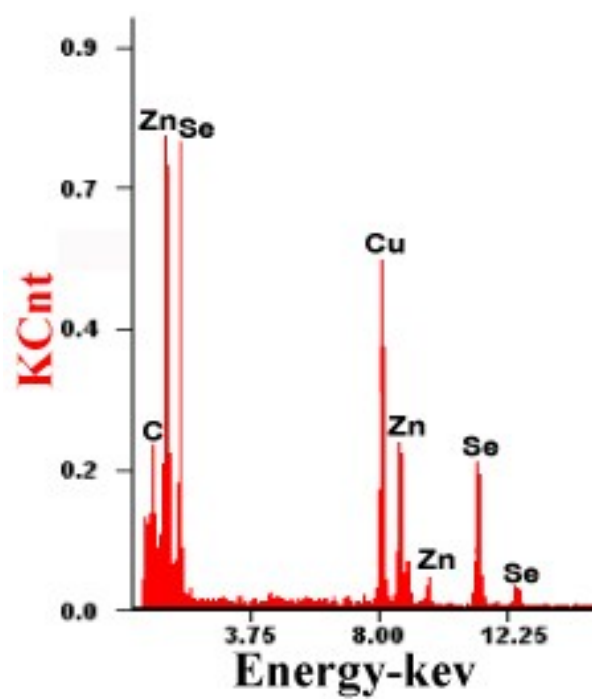

**Fig. S11** Elemental analysis of ZnSe CS/C. The EDS spectrum of the ZnSe CS/C.

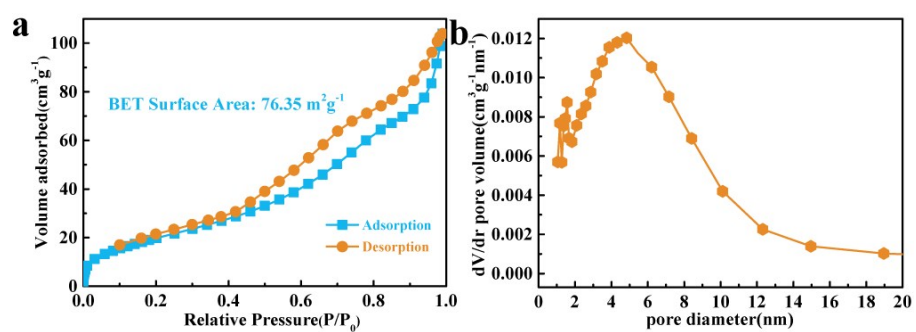

**Fig. S12** (a)  $N_2$  adsorption/ desorption isotherms and (b) corresponding pore size distribution of ZnSe LS/C.

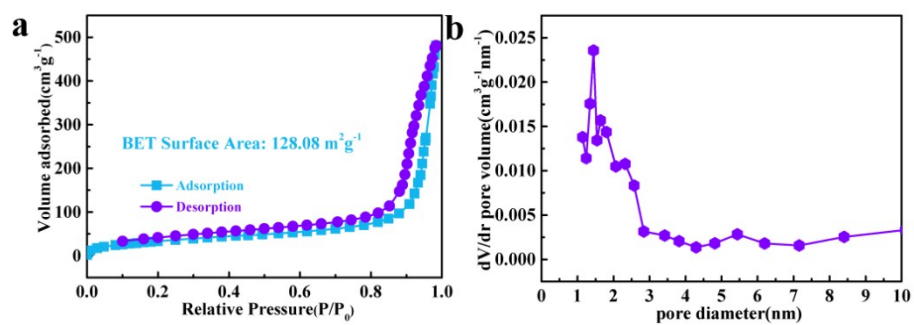

**Fig. S13** (a)  $N_2$  adsorption/ desorption isotherms and (b) corresponding pore size distribution of ZnSe FS/C.

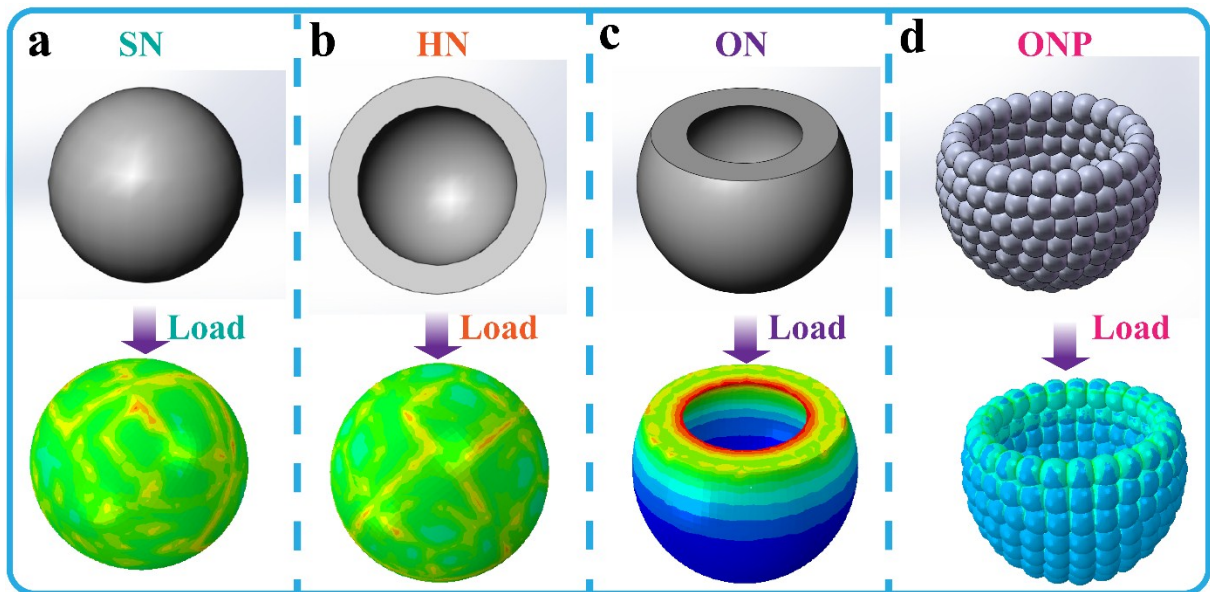

**Fig. S14** Simulation of differential models structural stability suffer from diffusion-induced stresses. Drawing standard size models with Solidworks and calculated stress distributions overall view of (a) SN, (b) HN, (c) ON and (d) ONP.





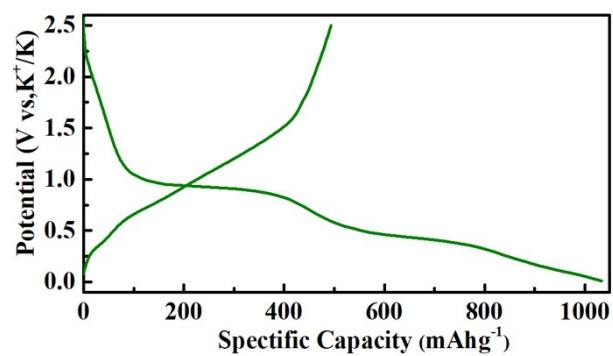

**Fig. S16** The initial discharge/charge profiles analysis of ZnSe CS/C. The initial charge and discharge profiles of the ZnSe CS/C at 50 mA g<sup>-1</sup>.

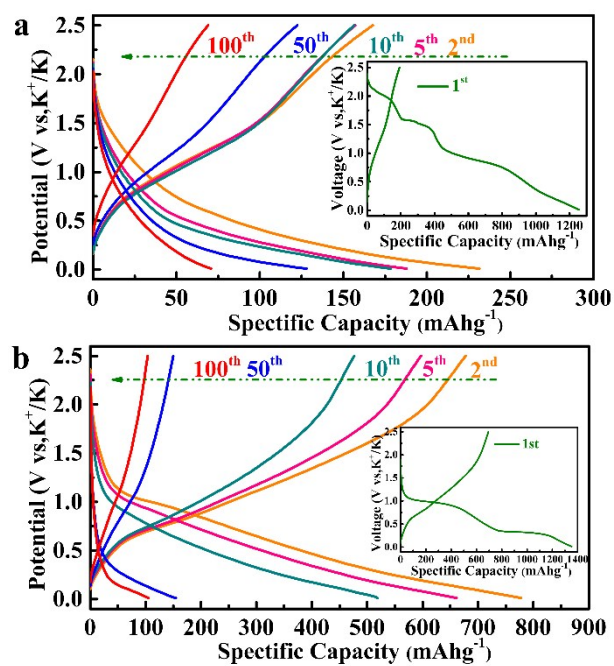

**Fig. S17** Discharge/charge profiles analysis of the ZnSe LS/C and ZnSe FS/C for different cycles. Discharge/charge profiles for the 1<sup>st</sup>, 2<sup>nd</sup>, 5<sup>th</sup>, 10<sup>th</sup>, 50<sup>th</sup> and 100<sup>th</sup> cycles of (a) ZnSe LS/C and (b) ZnSe FS/C at 50 mA g<sup>-1</sup>.

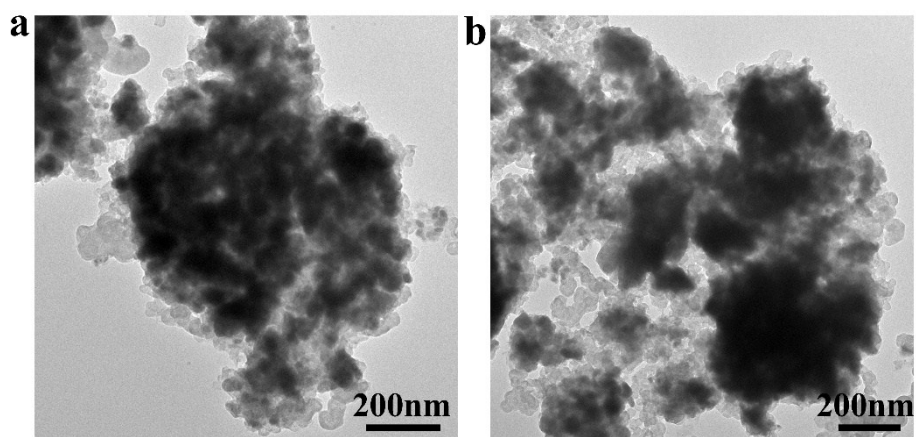

**Fig. S18** TEM images of (a) ZnSe LS/C and (b) ZnSe FS/C electrode after 100 cycles at  $100 \text{ mA g}^{-1}$ .

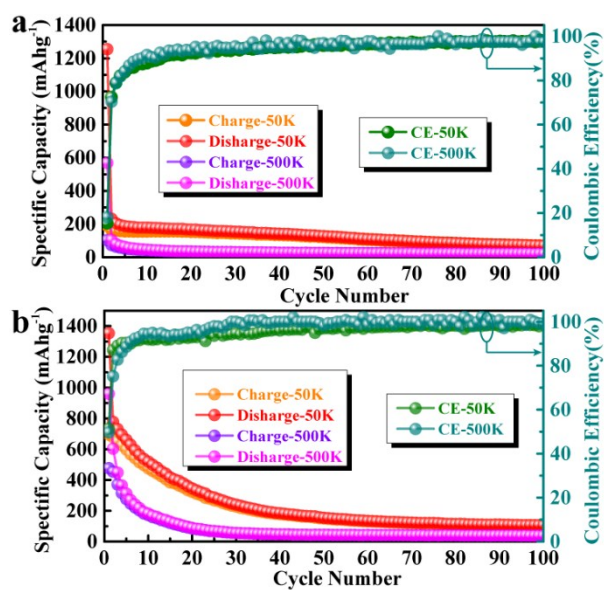

**Fig. S19** Cycling performance analysis of the ZnSe LS/C and ZnSe FS/C. Cycling performance of (a) ZnSe LS/C and (b) ZnSe FS/C at 50 mA g<sup>-1</sup> and 500 mA g<sup>-1</sup>, respectively.

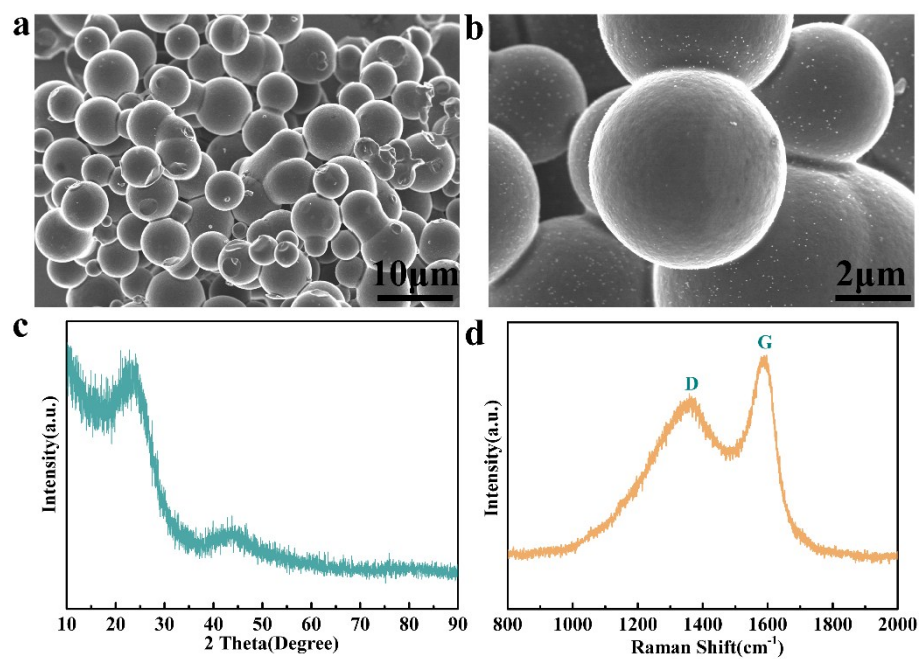

**Fig. S20** (a, b) SEM images, (c) XRD pattern and (d) Raman spectrum of the as-prepared amorphous carbon.

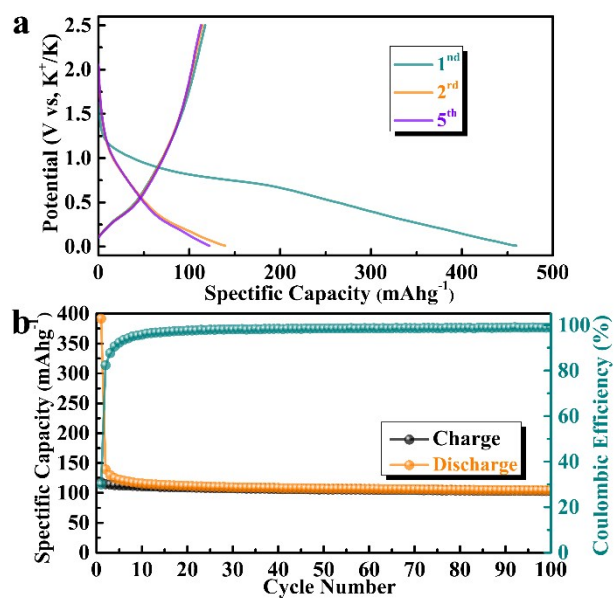

**Fig. S21** Cycling stability and Coulombic efficiency of the amorphous carbon at 50 mA g<sup>-1</sup>.

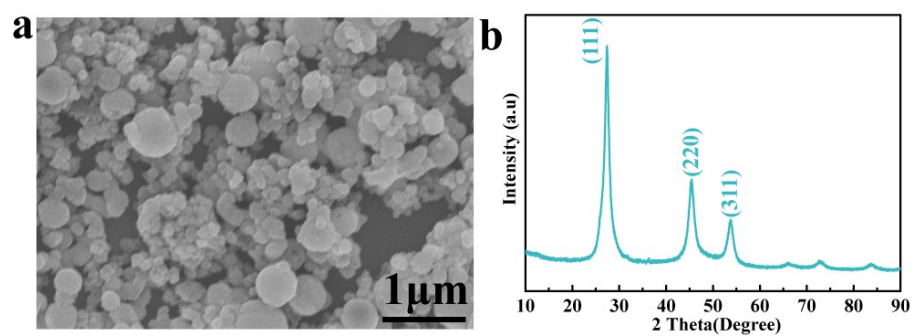

**Fig. S22** (a) FESEM image and (b)XRD pattern of the as-prepared pure ZnSe.

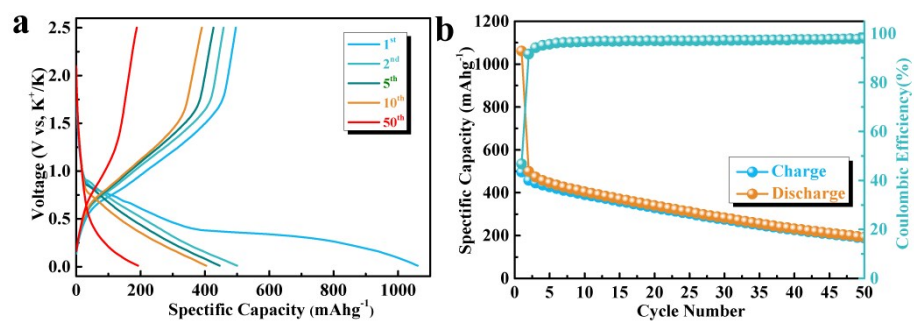

**Fig. S23** (a) Charge–discharge voltage profiles from the first to fiftith cycle and (b) charge/discharge capacity of pure ZnSe at 50 mA g<sup>-1</sup>.



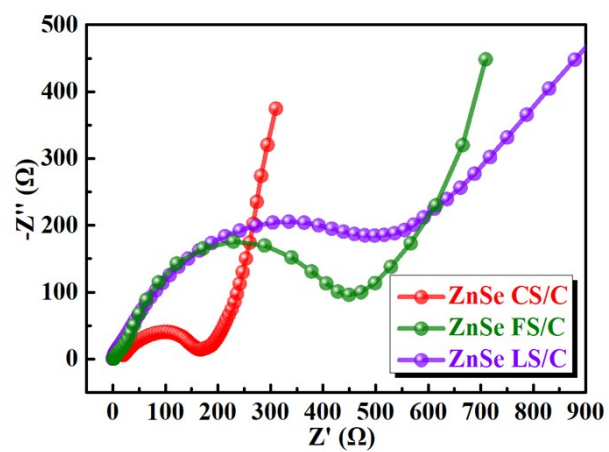

**Fig. S24** Nyquist plots for ZnSe CS/C, ZnSe LS/C and ZnSe FS/C in original cycles, respectively.

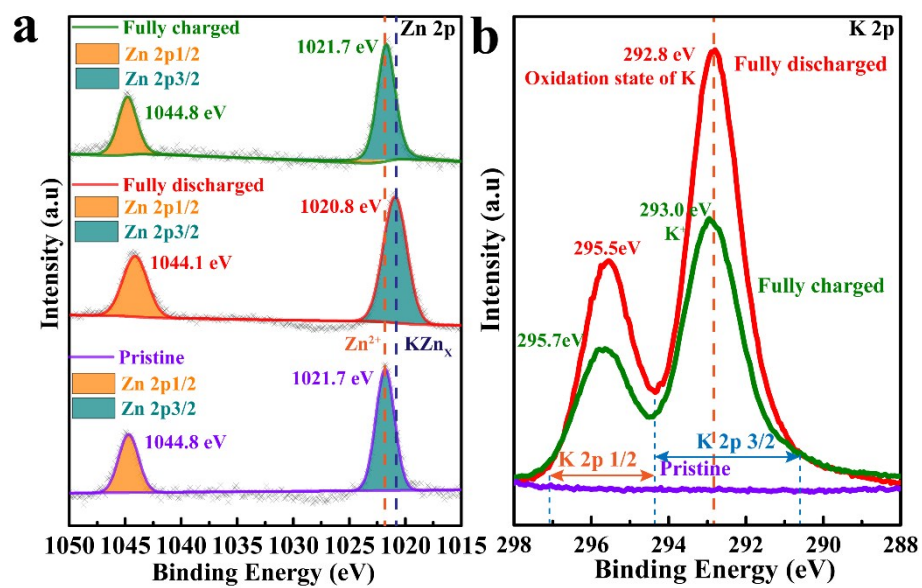

**Fig. S25** *Ex situ* core-level XPS analysis for the ZnSe CS/C electrode at different potassiation/dopotassiation states. (a) Zn 2p and (b) K 2p.

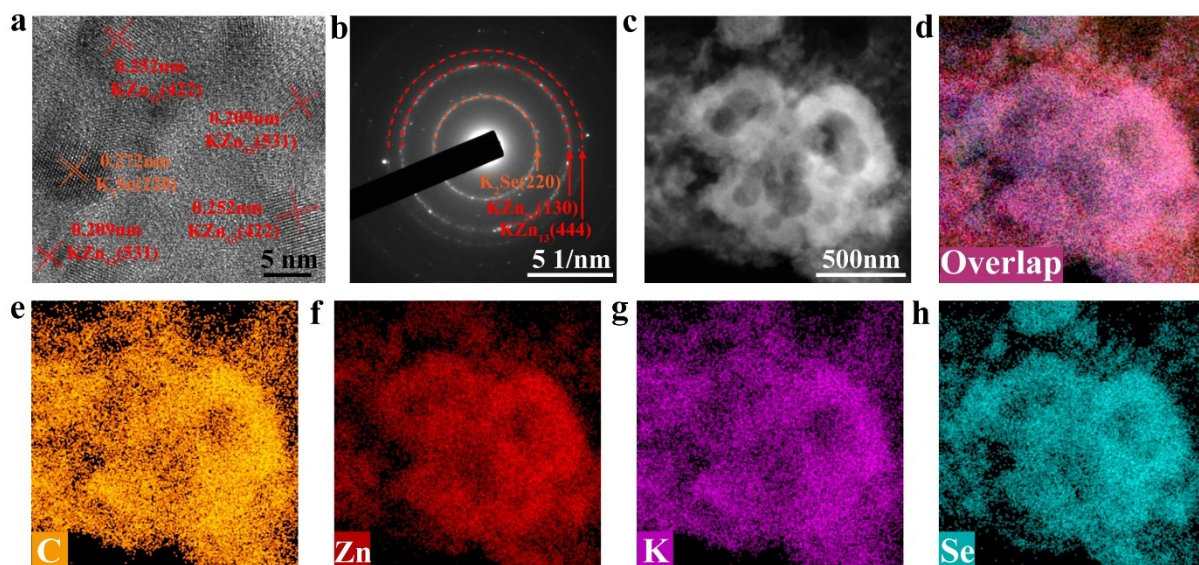

**Fig. S26** (a) HRTEM image of the ZnSe CS/C electrode after fully discharged (0.01 V) and the corresponding (b) SAED patterns. (c) HAADF-STEM image and (d-h) EDS mappings of C, Zn, K, and Se in ZnSe CS/C electrode after fully discharged to 0.01 V.

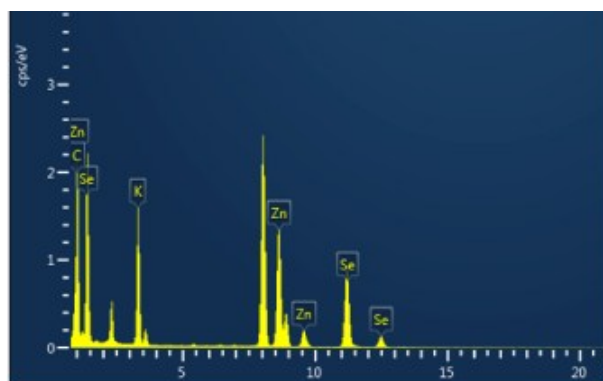

**Fig. S27** The EDS spectrum of the ZnSe CS/C electrode after fully discharged to 0.01 V.

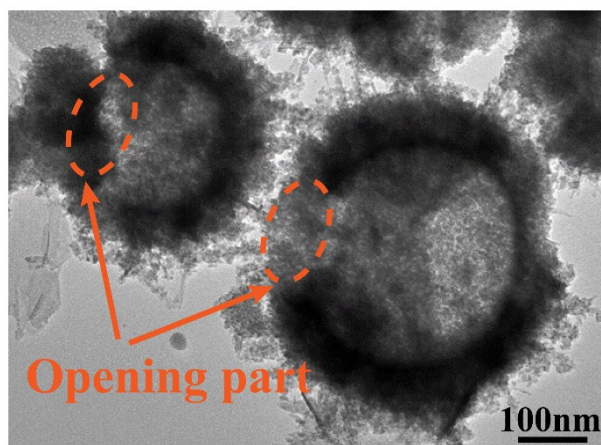

**Fig. S28** Postmortem characterization of the ZnSe CS/C electrode after cycling. TEM image of ZnSe CS/C electrode after 100 cycles at 100 mA g<sup>-1</sup>.

**Table S1** The element content of the ZnSe CS/C via EDS mapping analysis.

| Element | Weight % | Atomic % |
|---------|----------|----------|
| Zn      | 52.58    | 23.95    |
| Se      | 26.42    | 24.44    |
| C       | 20.47    | 50.49    |
| Totals  | 100.00   | 100.00   |

**Table S2** The carbon sulfur analyzer data of ZnSe LS/C, ZnSe CS/C and ZnSe FS/C.

| Sample           | ZnSe LS/C | ZnSe CS/C | ZnSe FS/C |
|------------------|-----------|-----------|-----------|
| Carbon Content % | 19.56     | 20.37     | 18.34     |

**Table S3** The geometric size for various models.

| Model | Outer diameter (nm) | Inner diameter (nm) | Radius of the particle sphere (nm) |
|-------|---------------------|---------------------|------------------------------------|
| I     | 75                  | ---                 | ---                                |
| II    | 75                  | 55                  | ---                                |
| III   | 75                  | 55                  | ---                                |
| IV    | 75                  | 55                  | 10                                 |

The opening portion is one quarter of the diameter direction of the entire sphere in model III and model IV.



**Table S4** The element content of the ZnSe CS/C electrode after fully discharged to 0.01 V via EDS analysis.

| Element | Weight % | Atomic % |
|---------|----------|----------|
| Zn      | 23.71    | 12.74    |
| Se      | 30.68    | 13.56    |
| K       | 29.31    | 26.24    |
| C       | 16.3     | 47.46    |
| Totals  | 100.00   | 100.00   |
